# Supplementary material for: Higher Activity of the Inducible Nitric Oxide Synthase Contributes to Very Early Onset Inflammatory Bowel Disease
Source: PubMed Central journal article supplement — Clin Transl Gastroenterol. 2014 Jan 16;5(1):e46–. doi: 10.1038/ctg.2013.17 (PMC3912315; doi:10.1038/ctg.2013.17), 2014-01-16
Supplement: ctg201317x1.pdf [file ctg201317x1.pdf]

## Supplemental Materials

Supplementary Figure 1a.

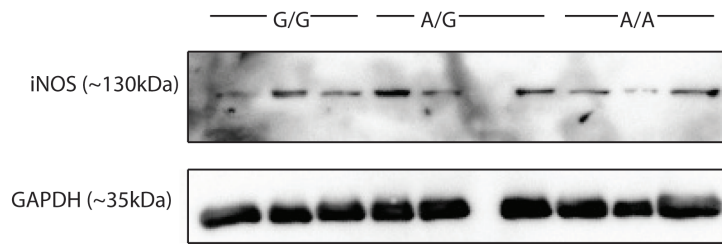

Supplementary Figure 1b.

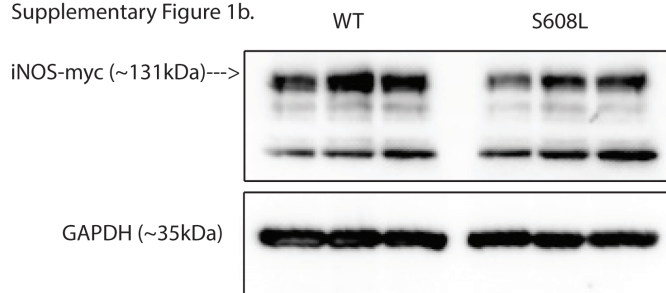

**Supplementary Figure 1:** iNOS expression in B-lymphoblastoid and transfected Henle-407 cells. 1a. iNOS expression in B-lymphoblastoid cell lines genotyped for the rs2297518 variant were measured at the time of Griess assay. (G/G) is the non-risk genotype, (A/G) is the heterozygous genotype, and (A/A) is the risk genotype. 1b. iNOS-myc expression was measured in three replicates of both variants in transfected Henle-407 cells. (WT) is the wildtype form of iNOS and (S608L) is the risk variant.

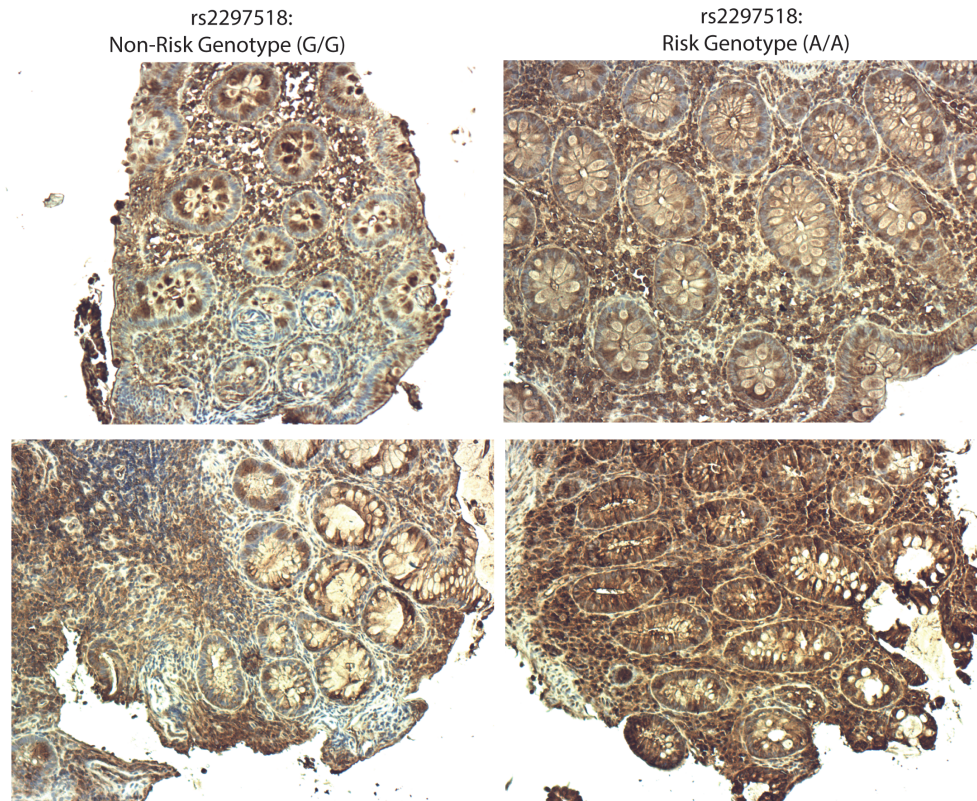

**Supplementary Figure 2:** Immunohistochemistry staining for nitrotyrosine. Immunohistochemistry staining for nitrotyrosine (see Methods) of paraffin-embedded slides of colonic biopsies of VEO-IBD patients from the Hospital for Sick Children genotyped for the rs2297518 SNP. Shown are the non-risk (G/G) and risk genotypes (A/A). Images shown are taken at 10x magnification.

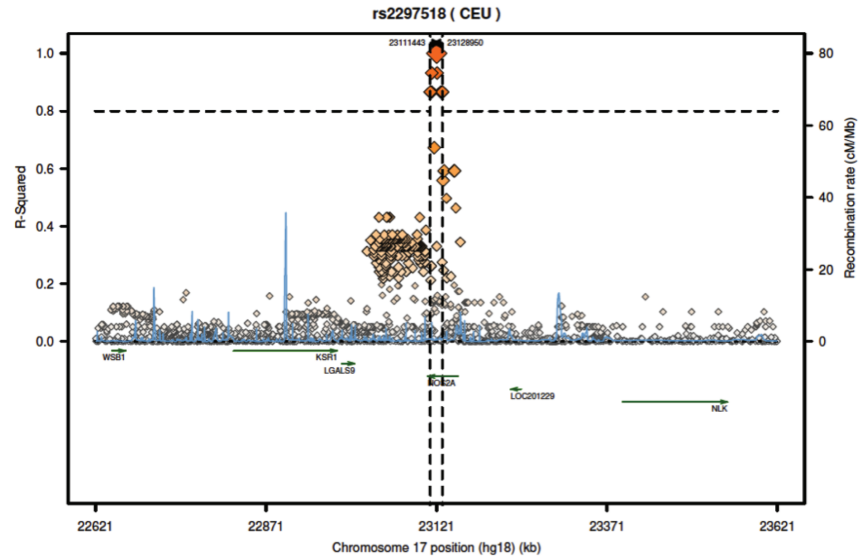

**Supplementary Figure 3:** Regional LD Plot generated from SNAP. SNP Association and Proxy Search (<http://www.broadinstitute.org/mpg/snap/>). “SNAP finds proxy SNPs based on linkage disequilibrium, physical distance and/or membership in selected commercial genotyping arrays. Pair-wise linkage disequilibrium is pre-calculated based on phased genotype data from the [International HapMap Project](#). Information about the genotyping arrays is based on data published by the vendors.” Figure was generated based on 1000 Genomes Project Database.

Supplementary Table 1: Initial cohort additive and dominant association analyses of 17 NOS2 SNPs with VEO-IBD.

| Chr. | SNP        | Position | MAF     | FU       | FA      | Additive                             |        |                         |        | Dominant                |        |                         |        |
|------|------------|----------|---------|----------|---------|--------------------------------------|--------|-------------------------|--------|-------------------------|--------|-------------------------|--------|
|      |            |          |         |          |         | P-Value                              | OR     | P-Value                 | OR     | P-Value                 | OR     | P-Value                 | OR     |
| 17   | rs2297518  | 23120724 | 0.1822  | 0.1796   | 0.2381  | 2.96 <sup>10</sup> x10 <sup>-3</sup> | 1.529  | 2.9610x10 <sup>-3</sup> | 1.529  | 2.9610x10 <sup>-3</sup> | 1.529  | 2.9610x10 <sup>-3</sup> | 1.529  |
| 17   | rs1137933  | 23130059 | 0.2176  | 0.2151   | 0.2738  | 5.5000x10 <sup>-3</sup>              | 1.45   | 5.5000x10 <sup>-3</sup> | 1.45   | 5.5000x10 <sup>-3</sup> | 1.45   | 5.5000x10 <sup>-3</sup> | 1.45   |
| 17   | rs9906835  | 23113501 | 0.4295  | 0.4317   | 0.381   | 6.2200x10 <sup>-2</sup>              | 0.7919 | 6.2200x10 <sup>-2</sup> | 0.7919 | 6.2200x10 <sup>-2</sup> | 0.7919 | 6.2200x10 <sup>-2</sup> | 0.7919 |
| 17   | rs944725   | 23133698 | 0.4108  | 0.4067   | 0.5     | 8.4040x10 <sup>-2</sup>              | 1.235  | 8.4040x10 <sup>-2</sup> | 1.235  | 8.4040x10 <sup>-2</sup> | 1.235  | 8.4040x10 <sup>-2</sup> | 1.235  |
| 17   | rs3730013  | 23150045 | 0.3445  | 0.3466   | 0.2976  | 9.4010x10 <sup>-2</sup>              | 0.8    | 9.4010x10 <sup>-2</sup> | 0.8    | 9.4010x10 <sup>-2</sup> | 0.8    | 9.4010x10 <sup>-2</sup> | 0.8    |
| 17   | rs4795067  | 23130802 | 0.3382  | 0.3375   | 0.3537  | 1.2970x10 <sup>-1</sup>              | 1.203  | 1.2970x10 <sup>-1</sup> | 1.203  | 1.2970x10 <sup>-1</sup> | 1.203  | 1.2970x10 <sup>-1</sup> | 1.203  |
| 17   | rs2297516  | 23119857 | 0.423   | 0.4246   | 0.3875  | 1.6020x10 <sup>-1</sup>              | 0.8402 | 1.6020x10 <sup>-1</sup> | 0.8402 | 1.6020x10 <sup>-1</sup> | 0.8402 | 1.6020x10 <sup>-1</sup> | 0.8402 |
| 17   | rs3794764  | 23135555 | 0.2362  | 0.2372   | 0.2143  | 1.8250x10 <sup>-1</sup>              | 0.8194 | 1.8250x10 <sup>-1</sup> | 0.8194 | 1.8250x10 <sup>-1</sup> | 0.8194 | 1.8250x10 <sup>-1</sup> | 0.8194 |
| 17   | rs8072199  | 23140975 | 0.4457  | 0.4427   | 0.5119  | 1.9670x10 <sup>-1</sup>              | 1.173  | 1.9670x10 <sup>-1</sup> | 1.173  | 1.9670x10 <sup>-1</sup> | 1.173  | 1.9670x10 <sup>-1</sup> | 1.173  |
| 17   | rs10459953 | 23151645 | 0.3568  | 0.3579   | 0.3333  | 2.0050x10 <sup>-1</sup>              | 0.8468 | 2.0050x10 <sup>-1</sup> | 0.8468 | 2.0050x10 <sup>-1</sup> | 0.8468 | 2.0050x10 <sup>-1</sup> | 0.8468 |
| 17   | rs2314809  | 23119505 | 0.4017  | 0.4032   | 0.369   | 2.9420x10 <sup>-1</sup>              | 0.8797 | 2.9420x10 <sup>-1</sup> | 0.8797 | 2.9420x10 <sup>-1</sup> | 0.8797 | 2.9420x10 <sup>-1</sup> | 0.8797 |
| 17   | rs11080344 | 23128638 | 0.4613  | 0.4601   | 0.4881  | 3.1250x10 <sup>-1</sup>              | 1.131  | 3.1250x10 <sup>-1</sup> | 1.131  | 3.1250x10 <sup>-1</sup> | 1.131  | 3.1250x10 <sup>-1</sup> | 1.131  |
| 17   | rs3794756  | 23110756 | 0.00835 | 0.007642 | 0.02381 | 3.7540x10 <sup>-1</sup>              | 1.663  | 3.7540x10 <sup>-1</sup> | 1.663  | 3.7540x10 <sup>-1</sup> | 1.663  | 3.7540x10 <sup>-1</sup> | 1.663  |
| 17   | rs3729508  | 23133157 | 0.4013  | 0.4022   | 0.381   | 4.1340x10 <sup>-1</sup>              | 0.9045 | 4.1340x10 <sup>-1</sup> | 0.9045 | 4.1340x10 <sup>-1</sup> | 0.9045 | 4.1340x10 <sup>-1</sup> | 0.9045 |
| 17   | rs11653716 | 23108659 | 0.03239 | 0.03115  | 0.05952 | 5.1890x10 <sup>-1</sup>              | 1.237  | 5.1890x10 <sup>-1</sup> | 1.237  | 5.1890x10 <sup>-1</sup> | 1.237  | 5.1890x10 <sup>-1</sup> | 1.237  |
| 17   | rs2314810  | 23128237 | 0.0466  | 0.0465   | 0.04878 | 5.8000x10 <sup>-1</sup>              | 1.16   | 5.8000x10 <sup>-1</sup> | 1.16   | 5.8000x10 <sup>-1</sup> | 1.16   | 5.8000x10 <sup>-1</sup> | 1.16   |
| 17   | rs3730017  | 23133229 | 0.02086 | 0.02072  | 0.02381 | 8.8050x10 <sup>-1</sup>              | 1.065  | 8.8050x10 <sup>-1</sup> | 1.065  | 8.8050x10 <sup>-1</sup> | 1.065  | 8.8050x10 <sup>-1</sup> | 1.065  |

The initial cohort consisted of 1075 subjects (159 VEO-IBD, 91 VEO-CD, 68 VEO-UC subjects, 913 healthy controls). P values are presented as uncorrected. CD, Crohn's disease; MAF, minor allelic frequency; FA, frequency affected; FU, frequency unaffected; IBD, inflammatory bowel disease; L95 and U95, lower and upper 95<sup>th</sup> confidence interval; SNP, single nucleotide polymorphism; UC, ulcerative colitis.



Supplementary Table 2: Initial cohort association analyses of 17 NOS2 SNPs with VEO-CD.

| CHR | SNP        | position   | MAF      | FU       | FA       | Additive |        |        |       | Dominant |        |        |        | Recessive |        |        |       |
|-----|------------|------------|----------|----------|----------|----------|--------|--------|-------|----------|--------|--------|--------|-----------|--------|--------|-------|
|     |            |            |          |          |          | P-Value  | OR     | L95    | U95   | P-Value  | OR     | L95    | U95    | P-Value   | OR     | L95    | U95   |
| 17  | rs11653716 | 23,108,659 | 0.03204  | 0.03115  | 0.03333  | 0.402    | 1.457  | 0.6043 | 3.511 | 0.402    | 1.457  | 0.6043 | 3.511  | NA        | NA     | NA     | NA    |
| 17  | rs3794756  | 23,110,756 | 0.008638 | 0.007642 | 0.005495 | 0.09314  | 2.974  | 0.8333 | 10.61 | 0.09314  | 2.974  | 0.8333 | 10.61  | NA        | NA     | NA     | NA    |
| 17  | rs9906835  | 23,113,501 | 0.4292   | 0.4317   | 0.358    | 0.4176   | 0.863  | 0.6043 | 1.232 | 0.5973   | 0.8697 | 0.518  | 1.46   | 0.409     | 0.7471 | 0.374  | 1.492 |
| 17  | rs2314809  | 23,119,505 | 0.3992   | 0.4032   | 0.3901   | 0.2003   | 0.7926 | 0.5554 | 1.131 | 0.02995  | 0.5786 | 0.353  | 0.9482 | 0.7011    | 1.131  | 0.6034 | 2.12  |
| 17  | rs2297516  | 23,119,857 | 0.4236   | 0.4246   | 0.3596   | 0.7505   | 0.9441 | 0.6624 | 1.346 | 0.6772   | 0.8958 | 0.5337 | 1.504  | 0.9444    | 0.9772 | 0.5119 | 1.866 |
| 17  | rs2297518  | 23,120,724 | 0.1845   | 0.1796   | 0.2527   | 0.04118  | 1.536  | 1.017  | 2.319 | 0.2821   | 1.319  | 0.7963 | 2.186  | 0.001285  | 4.251  | 1.761  | 10.26 |
| 17  | rs2314810  | 23,128,237 | 0.04786  | 0.0465   | 0.04444  | 0.3066   | 1.443  | 0.7142 | 2.917 | 0.2455   | 1.548  | 0.7406 | 3.235  | NA        | NA     | NA     | NA    |
| 17  | rs11080344 | 23,128,638 | 0.4639   | 0.4601   | 0.4725   | 0.2166   | 1.248  | 0.8784 | 1.772 | 0.8606   | 0.9527 | 0.5546 | 1.637  | 0.02223   | 1.862  | 1.093  | 3.172 |
| 17  | rs1137933  | 23,130,059 | 0.219    | 0.2151   | 0.3      | 0.1301   | 1.347  | 0.9159 | 1.981 | 0.6149   | 1.137  | 0.6891 | 1.877  | 0.005399  | 2.953  | 1.377  | 6.33  |
| 17  | rs4795067  | 23,130,802 | 0.3396   | 0.3375   | 0.3944   | 0.4882   | 1.132  | 0.7974 | 1.607 | 0.8692   | 1.043  | 0.6348 | 1.712  | 0.2397    | 1.48   | 0.77   | 2.843 |
| 17  | rs3729508  | 23,133,157 | 0.4013   | 0.4022   | 0.3681   | 0.7789   | 0.9511 | 0.6702 | 1.35  | 0.3034   | 0.7695 | 0.4671 | 1.267  | 0.4281    | 1.281  | 0.6942 | 2.364 |
| 17  | rs3730017  | 23,133,229 | 0.02132  | 0.02072  | 0.01648  | 0.4959   | 1.446  | 0.5003 | 4.177 | 0.4959   | 1.446  | 0.5003 | 4.177  | NA        | NA     | NA     | NA    |
| 17  | rs944725   | 23,133,698 | 0.4075   | 0.4067   | 0.4889   | 0.7762   | 1.052  | 0.7401 | 1.496 | 0.5953   | 0.8715 | 0.5246 | 1.448  | 0.2284    | 1.445  | 0.7937 | 2.632 |
| 17  | rs3794764  | 23,135,555 | 0.234    | 0.2372   | 0.2111   | 0.226    | 0.7625 | 0.4917 | 1.183 | 0.208    | 0.7164 | 0.4262 | 1.204  | 0.6367    | 0.7507 | 0.2283 | 2.468 |
| 17  | rs8072199  | 23,140,975 | 0.4426   | 0.4427   | 0.511    | 0.9722   | 0.9937 | 0.6951 | 1.42  | 0.49     | 1.217  | 0.6972 | 2.123  | 0.3831    | 0.7352 | 0.3684 | 1.467 |
| 17  | rs3730013  | 23,150,045 | 0.343    | 0.3466   | 0.3022   | 0.2095   | 0.7813 | 0.5314 | 1.149 | 0.4501   | 0.8267 | 0.5045 | 1.355  | 0.1538    | 0.4725 | 0.1687 | 1.324 |
| 17  | rs10459953 | 23,151,645 | 0.3576   | 0.3579   | 0.2967   | 0.9065   | 0.9783 | 0.6786 | 1.41  | 0.436    | 0.8214 | 0.5006 | 1.348  | 0.3609    | 1.37   | 0.6975 | 2.69  |

The initial cohort consisted of 1075 subjects (159 VEO-IBD, 91 VEO-CD, 68 VEO-UC subjects, 913 healthy controls). p Values are presented as uncorrected. CD, Crohn's disease; MAF, minor allelic frequency; FA, frequency affected; FU, frequency unaffected; IBD, inflammatory bowel disease; L95 and U95, lower and upper 95<sup>th</sup> confidence interval; SNP, single nucleotide polymorphism.; UC, ulcerative colitis.

Supplementary Table 3: Initial cohort association analyses of 17 NOS2 SNPs with VEO-UC.

| CH<br>R | SNP        | position   | MAF      | FU       | FA      | Additive |        |        |       | Dominant |        |        |        | Recessive |        |        |       |
|---------|------------|------------|----------|----------|---------|----------|--------|--------|-------|----------|--------|--------|--------|-----------|--------|--------|-------|
|         |            |            |          |          |         | P-Value  | OR     | L95    | U95   | P-Value  | OR     | L95    | U95    | P-Value   | OR     | L95    | U95   |
| 17      | rs11653716 | 23,108,659 | 0.03204  | 0.03115  | 0.04412 | 0.402    | 1.457  | 0.6043 | 3.511 | 0.402    | 1.457  | 0.6043 | 3.511  | NA        | NA     | NA     | NA    |
| 17      | rs3794756  | 23,110,756 | 0.008638 | 0.007642 | 0.02206 | 0.09314  | 2.974  | 0.8333 | 10.61 | 0.09314  | 2.974  | 0.8333 | 10.61  | NA        | NA     | NA     | NA    |
| 17      | rs9906835  | 23,113,501 | 0.4292   | 0.4317   | 0.3955  | 0.4176   | 0.863  | 0.6043 | 1.232 | 0.5973   | 0.8697 | 0.518  | 1.46   | 0.409     | 0.7471 | 0.374  | 1.492 |
| 17      | rs2314809  | 23,119,505 | 0.3992   | 0.4032   | 0.3456  | 0.2003   | 0.7926 | 0.5554 | 1.131 | 0.02995  | 0.5786 | 0.353  | 0.9482 | 0.7011    | 1.131  | 0.6034 | 2.12  |
| 17      | rs2297516  | 23,119,857 | 0.4236   | 0.4246   | 0.4104  | 0.7505   | 0.9441 | 0.6624 | 1.346 | 0.6772   | 0.8958 | 0.5337 | 1.504  | 0.9444    | 0.9772 | 0.5119 | 1.866 |
| 17      | rs2297518  | 23,120,724 | 0.1845   | 0.1796   | 0.25    | 0.04118  | 1.536  | 1.017  | 2.319 | 0.2821   | 1.319  | 0.7963 | 2.186  | 0.001285  | 4.251  | 1.761  | 10.26 |
| 17      | rs2314810  | 23,128,237 | 0.04786  | 0.0465   | 0.06618 | 0.3066   | 1.443  | 0.7142 | 2.917 | 0.2455   | 1.548  | 0.7406 | 3.235  | NA        | NA     | NA     | NA    |
| 17      | rs11080344 | 23,128,638 | 0.4639   | 0.4601   | 0.5147  | 0.2166   | 1.248  | 0.8784 | 1.772 | 0.8606   | 0.9527 | 0.5546 | 1.637  | 0.02223   | 1.862  | 1.093  | 3.172 |
| 17      | rs1137933  | 23,130,059 | 0.219    | 0.2151   | 0.2721  | 0.1301   | 1.347  | 0.9159 | 1.981 | 0.6149   | 1.137  | 0.6891 | 1.877  | 0.005399  | 2.953  | 1.377  | 6.33  |
| 17      | rs4795067  | 23,130,802 | 0.3396   | 0.3375   | 0.3676  | 0.4882   | 1.132  | 0.7974 | 1.607 | 0.8692   | 1.043  | 0.6348 | 1.712  | 0.2397    | 1.48   | 0.77   | 2.843 |
| 17      | rs3729508  | 23,133,157 | 0.4013   | 0.4022   | 0.3897  | 0.7789   | 0.9511 | 0.6702 | 1.35  | 0.3034   | 0.7695 | 0.4671 | 1.267  | 0.4281    | 1.281  | 0.6942 | 2.364 |
| 17      | rs3730017  | 23,133,229 | 0.02132  | 0.02072  | 0.02941 | 0.4959   | 1.446  | 0.5003 | 4.177 | 0.4959   | 1.446  | 0.5003 | 4.177  | NA        | NA     | NA     | NA    |
| 17      | rs944725   | 23,133,698 | 0.4075   | 0.4067   | 0.4191  | 0.7762   | 1.052  | 0.7401 | 1.496 | 0.5953   | 0.8715 | 0.5246 | 1.448  | 0.2284    | 1.445  | 0.7937 | 2.632 |
| 17      | rs3794764  | 23,135,555 | 0.234    | 0.2372   | 0.1912  | 0.226    | 0.7625 | 0.4917 | 1.183 | 0.208    | 0.7164 | 0.4262 | 1.204  | 0.6367    | 0.7507 | 0.2283 | 2.468 |
| 17      | rs8072199  | 23,140,975 | 0.4426   | 0.4427   | 0.4412  | 0.9722   | 0.9937 | 0.6951 | 1.42  | 0.49     | 1.217  | 0.6972 | 2.123  | 0.3831    | 0.7352 | 0.3684 | 1.467 |
| 17      | rs3730013  | 23,150,045 | 0.343    | 0.3466   | 0.2941  | 0.2095   | 0.7813 | 0.5314 | 1.149 | 0.4501   | 0.8267 | 0.5045 | 1.355  | 0.1538    | 0.4725 | 0.1687 | 1.324 |
| 17      | rs10459953 | 23,151,645 | 0.3576   | 0.3579   | 0.3529  | 0.9065   | 0.9783 | 0.6786 | 1.41  | 0.436    | 0.8214 | 0.5006 | 1.348  | 0.3609    | 1.37   | 0.6975 | 2.69  |

The initial cohort consisted of 1075 subjects (159 VEO-IBD, 91 VEO-CD, 68 VEO-UC subjects, 913 healthy controls). p Values are presented as uncorrected. CD, Crohn's disease; MAF, minor allelic frequency; FA, frequency affected; FU, frequency unaffected; IBD, inflammatory bowel disease; L95 and U95, lower and upper 95<sup>th</sup> confidence interval; SNP, single nucleotide polymorphism.; UC, ulcerative colitis.

Supplementary Table 4: Initial cohort association analyses of 17 NOS2 SNPs with IBD diagnosed under the age of 6 years.

| CHR | SNP        | position | MAF          | Additive     |         |            |        |        |       | Dominant |        |        |       | Recessive |               |        |       |
|-----|------------|----------|--------------|--------------|---------|------------|--------|--------|-------|----------|--------|--------|-------|-----------|---------------|--------|-------|
|     |            |          |              | FU           | FA      | P-Value    | OR     | L95    | U95   | P-Value  | OR     | L95    | U95   | P-Value   | OR            | L95    | U95   |
| 17  | rs2297518  | 23120724 | 0.1822       | 0.1796       | 0.2516  | 1.7440E-01 | 1.435  | 0.8522 | 2.415 | 0.9961   | 1.002  | 0.5197 | 1.931 | 0.0001861 | 6.174         | 2.377  | 16.04 |
| 17  | rs1137933  | 23130059 | 0.2176       | 0.2151       | 0.288   | 2.1030E-01 | 1.364  | 0.8394 | 2.215 | 0.5358   | 1.218  | 0.6519 | 2.278 | 0.05467   | 2.616         | 0.9809 | 6.974 |
| 17  | rs9906835  | 23113501 | 0.4295       | 0.4317       | 0.3742  | 3.6470E-01 | 0.8139 | 0.5214 | 1.27  | 0.1735   | 0.6472 | 0.3459 | 1.211 | 0.996     | 1.002         | 0.4558 | 2.203 |
| 17  | rs944725   | 23133698 | 0.4108       | 0.4067       | 0.4589  | 8.9850E-02 | 1.464  | 0.9425 | 2.274 | 0.1388   | 1.726  | 0.8379 | 3.557 | 0.2103    | 1.596         | 0.768  | 3.316 |
| 17  | rs3730013  | 23150045 | 0.3445       | 0.3466       | 0.2987  | 3.5120E-01 | 0.7949 | 0.4905 | 1.288 | 0.7121   | 0.8896 | 0.4778 | 1.656 | 0.1838    | 0.378         | 0.0900 | 1.587 |
| 17  | rs4795067  | 23130802 | 0.3382       | 0.3375       | 0.3829  | 7.6980E-01 | 1.069  | 0.6832 | 1.673 | 0.6478   | 0.8642 | 0.4621 | 1.616 | 0.2049    | 1.674         | 0.7548 | 3.713 |
| 17  | rs2297516  | 23119857 | 0.423        | 0.4246       | 0.3814  | 5.1510E-01 | 0.8596 | 0.5451 | 1.356 | 0.2326   | 0.6765 | 0.3561 | 1.285 | 0.7797    | 1.12          | 0.5068 | 2.474 |
| 17  | rs3794764  | 23135555 | 0.2362       | 0.2372       | 0.2025  | 6.3020E-01 | 0.8776 | 0.5159 | 1.493 | 0.8811   | 0.9531 | 0.5076 | 1.789 | 0.3656    | 0.3967        | 0.0535 | 2.94  |
| 17  | rs8072199  | 23140975 | 0.4457       | 0.4427       | 0.4811  | 2.0630E-01 | 1.333  | 0.8537 | 2.08  | 0.1198   | 1.861  | 0.8508 | 4.073 | 0.6952    | 1.163         | 0.5465 | 2.475 |
| 17  | rs10459953 | 23151645 | 0.3568       | 0.3579       | 0.3208  | 6.4430E-01 | 0.8961 | 0.5625 | 1.427 | 0.2368   | 0.6882 | 0.3706 | 1.278 | 0.411     | 1.419         | 0.6158 | 3.272 |
| 17  | rs2314809  | 23119505 | 0.4017       | 0.4032       | 0.3711  | 5.4240E-01 | 0.8714 | 0.5595 | 1.357 | 0.4164   | 0.7714 | 0.4126 | 1.442 | 0.9172    | 0.957         | 0.4175 | 2.193 |
| 17  | rs11080344 | 23128638 | 0.4613       | 0.4601       | 0.4906  | 6.1150E-01 | 1.121  | 0.7207 | 1.745 | 0.7219   | 0.8855 | 0.4532 | 1.73  | 0.2074    | 1.557         | 0.7823 | 3.1   |
| 17  | rs3794756  | 23110756 | 0.0083<br>51 | 0.0076<br>42 | 0.01258 | 1.3020E-01 | 3.221  | 0.7081 | 14.66 | 0.1302   | 3.221  | 0.7081 | 14.66 | NA        | NA            | NA     | NA    |
| 17  | rs3729508  | 23133157 | 0.4013       | 0.4022       | 0.3774  | 7.0280E-01 | 0.9174 | 0.5892 | 1.428 | 0.3966   | 0.7629 | 0.408  | 1.426 | 0.7082    | 1.163         | 0.528  | 2.56  |
| 17  | rs11653716 | 23108659 | 0.0323<br>9  | 0.0311<br>5  | 0.03797 | 1.5200E-01 | 2.034  | 0.7699 | 5.374 | 0.152    | 2.034  | 0.7699 | 5.374 | NA        | NA            | NA     | NA    |
| 17  | rs2314810  | 23128237 | 0.0466       | 0.0465       | 0.0538  | 9.2440E-01 | 1.05   | 0.3801 | 2.903 | 0.8637   | 1.097  | 0.3815 | 3.154 | 0.999     | 1.375E<br>-08 | 0      | inf   |
| 17  | rs3730017  | 23133229 | 0.0208<br>6  | 0.0207<br>2  | 0.02201 | 8.4480E-01 | 1.157  | 0.2695 | 4.964 | 0.8448   | 1.157  | 0.2695 | 4.964 | NA        | NA            | NA     | NA    |

The cohort for IBD under the age of 6 years analysis consisted of 955 subjects (42 IBD subjects, 913 healthy controls). p Values are presented as uncorrected. CD, Crohn's disease; MAF, minor allelic frequency; FA, frequency affected; FU, frequency unaffected; IBD, inflammatory bowel disease; L95 and U95, lower and upper 95<sup>th</sup> confidence interval; SNP, single nucleotide polymorphism.; UC, ulcerative colitis.

Supplementary Table 5: Initial cohort association analyses of 17 NOS2 SNPs with IBD diagnosed over the age of 17 years.

| CHR | SNP        | MAF      | FU       | FA       | Additive |        |        |       | Dominant |        | Recessive |        |
|-----|------------|----------|----------|----------|----------|--------|--------|-------|----------|--------|-----------|--------|
|     |            |          |          |          | P-Value  | OR     | L95    | U95   | P-Value  | OR     | P-Value   | OR     |
| 17  | rs11653716 | 0.03275  | 0.03115  | 0.03055  | 0.5858   | 1.107  | 0.768  | 1.596 | 0.7138   | 1.073  | 0.999     | NA     |
| 17  | rs3794756  | 0.007418 | 0.007642 | 0.009165 | 0.8779   | 0.9441 | 0.4533 | 1.966 | 0.7182   | 0.8668 | 0.9993    | NA     |
| 17  | rs9906835  | 0.4195   | 0.4317   | 0.4173   | 0.141    | 0.9075 | 0.7975 | 1.033 | 0.05513  | 0.8275 | 0.7259    | 0.9586 |
| 17  | rs2314809  | 0.4001   | 0.4032   | 0.39     | 0.7102   | 0.9756 | 0.8566 | 1.111 | 0.7362   | 0.9678 | 0.7896    | 0.9672 |
| 17  | rs2297516  | 0.4155   | 0.4246   | 0.4236   | 0.2711   | 0.9296 | 0.8162 | 1.059 | 0.1311   | 0.8617 | 0.8759    | 0.9811 |
| 17  | rs2297518  | 0.1905   | 0.1796   | 0.1908   | 0.09095  | 1.155  | 0.9772 | 1.366 | 0.2135   | 1.131  | 0.06308   | 1.637  |
| 17  | rs2314810  | 0.05436  | 0.0465   | 0.07245  | 0.03867  | 1.353  | 1.016  | 1.802 | 0.04099  | 1.373  | 0.4683    | 1.7    |
| 17  | rs11080344 | 0.4699   | 0.4601   | 0.4877   | 0.222    | 1.087  | 0.951  | 1.242 | 0.1839   | 1.151  | 0.5341    | 1.074  |
| 17  | rs1137933  | 0.2182   | 0.2151   | 0.2184   | 0.6463   | 1.037  | 0.8875 | 1.212 | 0.7077   | 1.037  | 0.6884    | 1.089  |
| 17  | rs4795067  | 0.3367   | 0.3375   | 0.3299   | 0.9215   | 0.9933 | 0.8685 | 1.136 | 0.9952   | 0.9994 | 0.8453    | 0.9727 |
| 17  | rs3729508  | 0.4029   | 0.4022   | 0.3921   | 0.9345   | 1.005  | 0.8827 | 1.145 | 0.8934   | 0.987  | 0.7448    | 1.041  |
| 17  | rs3730017  | 0.02309  | 0.02072  | 0.01738  | 0.3442   | 1.23   | 0.8007 | 1.891 | 0.451    | 1.186  | 0.999     | NA     |
| 17  | rs944725   | 0.4108   | 0.4067   | 0.4287   | 0.6081   | 1.035  | 0.9066 | 1.182 | 0.64     | 1.047  | 0.7212    | 1.046  |
| 17  | rs3794764  | 0.2381   | 0.2372   | 0.2546   | 0.888    | 1.011  | 0.868  | 1.178 | 0.8229   | 1.022  | 0.9129    | 0.9782 |
| 17  | rs8072199  | 0.4293   | 0.4427   | 0.4039   | 0.1025   | 0.8966 | 0.7866 | 1.022 | 0.03346  | 0.8083 | 0.7004    | 0.9547 |
| 17  | rs3730013  | 0.3437   | 0.3466   | 0.3411   | 0.7082   | 0.9743 | 0.85   | 1.117 | 0.4725   | 0.9343 | 0.7486    | 1.047  |
| 17  | rs10459953 | 0.3441   | 0.3579   | 0.3357   | 0.07876  | 0.885  | 0.7724 | 1.014 | 0.02556  | 0.8092 | 0.7994    | 0.9642 |

The cohort for IBD over the age of 17 years analysis consisted of 1842 subjects (918 IBD subjects, 419 CD, 499 UC, and 924 healthy controls). p Values are presented as uncorrected. CD, Crohn's disease; MAF, minor allelic frequency; FA, frequency affected; FU, frequency unaffected; IBD, inflammatory bowel disease; L95 and U95, lower and upper 95<sup>th</sup> confidence interval; SNP, single nucleotide polymorphism.; UC, ulcerative colitis.

Supplementary Table 6: Initial cohort association analyses of 17 NOS2 SNPs with CD diagnosed over the age of 17 years.

| CHR | SNP        | MAF      | FU       | FA      | Additive |        |        |        | Dominant |        | Recessive |        |
|-----|------------|----------|----------|---------|----------|--------|--------|--------|----------|--------|-----------|--------|
|     |            |          |          |         | P-Value  | OR     | L95    | U95    | P-Value  | OR     | P-Value   | OR     |
| 17  | rs11653716 | 0.03412  | 0.03115  | 0.03468 | 0.24     | 1.281  | 0.8473 | 1.938  | 0.3558   | 1.224  | 0.999     | NA     |
| 17  | rs3794756  | 0.007452 | 0.007642 | 0.01156 | 0.8784   | 0.9341 | 0.3899 | 2.238  | 0.6382   | 0.7938 | 0.9993    | NA     |
| 17  | rs9906835  | 0.4313   | 0.4317   | 0.4246  | 0.957    | 0.9958 | 0.8545 | 1.16   | 0.359    | 0.8974 | 0.3223    | 1.147  |
| 17  | rs2314809  | 0.3974   | 0.4032   | 0.396   | 0.4087   | 0.9368 | 0.8024 | 1.094  | 0.3132   | 0.8904 | 0.7934    | 0.9617 |
| 17  | rs2297516  | 0.4249   | 0.4246   | 0.435   | 0.9692   | 1.003  | 0.8593 | 1.171  | 0.5891   | 0.9382 | 0.4691    | 1.108  |
| 17  | rs2297518  | 0.1835   | 0.1796   | 0.1768  | 0.4599   | 1.079  | 0.8819 | 1.32   | 0.6523   | 1.055  | 0.2758    | 1.413  |
| 17  | rs2314810  | 0.0495   | 0.0465   | 0.07514 | 0.3192   | 1.194  | 0.8423 | 1.693  | 0.2644   | 1.231  | 0.6803    | 0.621  |
| 17  | rs11080344 | 0.4701   | 0.4601   | 0.4754  | 0.1432   | 1.124  | 0.961  | 1.316  | 0.3597   | 1.123  | 0.1359    | 1.221  |
| 17  | rs1137933  | 0.2139   | 0.2151   | 0.2124  | 0.8419   | 0.981  | 0.8126 | 1.184  | 0.9358   | 0.9908 | 0.7169    | 0.9079 |
| 17  | rs4795067  | 0.3323   | 0.3375   | 0.3179  | 0.4324   | 0.9377 | 0.7986 | 1.101  | 0.4303   | 0.9153 | 0.6589    | 0.9271 |
| 17  | rs3729508  | 0.4027   | 0.4022   | 0.396   | 0.9409   | 1.006  | 0.8617 | 1.174  | 0.7873   | 0.9692 | 0.6287    | 1.074  |
| 17  | rs3730017  | 0.02376  | 0.02072  | 0.0189  | 0.1583   | 1.414  | 0.8738 | 2.289  | 0.2566   | 1.34   | 0.999     | NA     |
| 17  | rs944725   | 0.407    | 0.4067   | 0.4292  | 0.9644   | 1.004  | 0.8562 | 1.176  | 0.7943   | 1.031  | 0.7999    | 0.9621 |
| 17  | rs3794764  | 0.2397   | 0.2372   | 0.2616  | 0.6682   | 1.04   | 0.8681 | 1.247  | 0.5778   | 1.065  | 0.9451    | 0.9836 |
| 17  | rs8072199  | 0.4279   | 0.4427   | 0.3899  | 0.03135  | 0.8414 | 0.719  | 0.9847 | 0.008319 | 0.7332 | 0.4847    | 0.9033 |
| 17  | rs3730013  | 0.3439   | 0.3466   | 0.3497  | 0.6754   | 0.9658 | 0.8206 | 1.137  | 0.4127   | 0.9119 | 0.7023    | 1.068  |
| 17  | rs10459953 | 0.3469   | 0.3579   | 0.3232  | 0.09755  | 0.8711 | 0.74   | 1.026  | 0.02774  | 0.7805 | 0.9221    | 0.9835 |

The cohort for IBD over the age of 17 years analysis consisted of 1842 subjects (918 IBD subjects, 419 CD, 499 UC, and 924 healthy controls). p Values are presented as uncorrected. CD, Crohn's disease; MAF, minor allelic frequency; FA, frequency affected; FU, frequency unaffected; IBD, inflammatory bowel disease; L95 and U95, lower and upper 95<sup>th</sup> confidence interval; SNP, single nucleotide polymorphism.; UC, ulcerative colitis.

Supplementary Table 7: Initial cohort association analyses of 17 NOS2 SNPs with UC diagnosed over the age of 17 years.

| CHR | SNP        | MAF      | FU       | FA       | Additive |        |        |        | Dominant |        | Recessive |        |
|-----|------------|----------|----------|----------|----------|--------|--------|--------|----------|--------|-----------|--------|
|     |            |          |          |          | P-Value  | OR     | L95    | U95    | P-Value  | OR     | P-Value   | OR     |
| 17  | rs11653716 | 0.03019  | 0.03115  | 0.02069  | 0.6617   | 0.8946 | 0.5432 | 1.473  | 0.6617   | 0.8946 | NA        | NA     |
| 17  | rs3794756  | 0.007536 | 0.007642 | 0.003448 | 0.9245   | 0.9545 | 0.3642 | 2.502  | 0.9245   | 0.9545 | NA        | NA     |
| 17  | rs9906835  | 0.4153   | 0.4317   | 0.4      | 0.01159  | 0.8056 | 0.6811 | 0.9528 | 0.02121  | 0.7524 | 0.07463   | 0.7486 |
| 17  | rs2314809  | 0.4051   | 0.4032   | 0.3759   | 0.7699   | 1.025  | 0.8688 | 1.209  | 0.5753   | 1.072  | 0.8674    | 0.9739 |
| 17  | rs2297516  | 0.4119   | 0.4246   | 0.3966   | 0.04898  | 0.845  | 0.7146 | 0.9993 | 0.04401  | 0.7799 | 0.2645    | 0.8357 |
| 17  | rs2297518  | 0.1904   | 0.1796   | 0.2241   | 0.03376  | 1.253  | 1.017  | 1.543  | 0.09813  | 1.227  | 0.03623   | 1.909  |
| 17  | rs2314810  | 0.05408  | 0.0465   | 0.06597  | 0.01243  | 1.539  | 1.098  | 2.158  | 0.0191   | 1.548  | 0.1507    | 3.007  |
| 17  | rs11080344 | 0.4629   | 0.4601   | 0.5176   | 0.6525   | 1.04   | 0.8768 | 1.233  | 0.2071   | 1.187  | 0.524     | 0.9084 |
| 17  | rs1137933  | 0.2206   | 0.2151   | 0.2326   | 0.3122   | 1.105  | 0.9103 | 1.342  | 0.4591   | 1.094  | 0.2867    | 1.311  |
| 17  | rs4795067  | 0.342    | 0.3375   | 0.3586   | 0.4754   | 1.064  | 0.898  | 1.26   | 0.378    | 1.112  | 0.8764    | 1.028  |
| 17  | rs3729508  | 0.4026   | 0.4022   | 0.3828   | 0.9528   | 1.005  | 0.8514 | 1.186  | 0.9421   | 1.009  | 0.9857    | 1.003  |
| 17  | rs3730017  | 0.02074  | 0.02072  | 0.01379  | 0.9916   | 1.003  | 0.5593 | 1.799  | 0.9916   | 1.003  | NA        | NA     |
| 17  | rs944725   | 0.412    | 0.4067   | 0.4276   | 0.4023   | 1.074  | 0.9087 | 1.27   | 0.6048   | 1.067  | 0.3696    | 1.15   |
| 17  | rs3794764  | 0.2358   | 0.2372   | 0.2379   | 0.8101   | 0.9765 | 0.8044 | 1.185  | 0.8092   | 0.9712 | 0.9109    | 0.9716 |
| 17  | rs8072199  | 0.44     | 0.4427   | 0.4375   | 0.6805   | 0.9655 | 0.817  | 1.141  | 0.4715   | 0.9122 | 0.907     | 1.018  |
| 17  | rs3730013  | 0.3455   | 0.3466   | 0.3207   | 0.8583   | 0.9843 | 0.8272 | 1.171  | 0.7461   | 0.9619 | 0.8997    | 1.023  |
| 17  | rs10459953 | 0.3506   | 0.3579   | 0.3655   | 0.2345   | 0.8996 | 0.7556 | 1.071  | 0.1611   | 0.8453 | 0.7408    | 0.9411 |

The cohort for IBD over the age of 17 years analysis consisted of 1842 subjects (918 IBD subjects, 419 CD, 499 UC, and 924 healthy controls). p Values are presented as uncorrected. CD, Crohn's disease; MAF, minor allelic frequency; FA, frequency affected; FU, frequency unaffected; IBD, inflammatory bowel disease; L95 and U95, lower and upper 95<sup>th</sup> confidence interval; SNP, single nucleotide polymorphism.; UC, ulcerative colitis.

Supplementary Table 8: Initial cohort association analyses of 17 NOS2 SNPs with IBD diagnosed between the ages of 11 and 17 years.

| CHR | SNP        | MAF      | FU       | FA      | Additive |        |        |        | Dominant |        | Recessive |        |
|-----|------------|----------|----------|---------|----------|--------|--------|--------|----------|--------|-----------|--------|
|     |            |          |          |         | P-Value  | OR     | L95    | U95    | P-Value  | OR     | P-Value   | OR     |
| 17  | rs11653716 | 0.03275  | 0.03115  | 0.03437 | 0.9302   | 0.98   | 0.6243 | 1.538  | 0.8095   | 0.9449 | 0.9993    | NA     |
| 17  | rs3794756  | 0.007418 | 0.007642 | 0.00719 | 0.668    | 1.203  | 0.5169 | 2.8    | 0.668    | 1.203  | NA        | NA     |
| 17  | rs9906835  | 0.4195   | 0.4317   | 0.407   | 0.4696   | 0.9444 | 0.8087 | 1.103  | 0.359    | 0.8974 | 0.839     | 0.9713 |
| 17  | rs2314809  | 0.4001   | 0.4032   | 0.397   | 0.504    | 0.9481 | 0.811  | 1.108  | 0.7607   | 0.9654 | 0.386     | 0.8763 |
| 17  | rs2297516  | 0.4155   | 0.4246   | 0.4062  | 0.9609   | 0.9961 | 0.8524 | 1.164  | 0.8572   | 0.9789 | 0.8963    | 1.019  |
| 17  | rs2297518  | 0.1905   | 0.1796   | 0.2016  | 0.4642   | 1.077  | 0.8823 | 1.316  | 0.8866   | 1.017  | 0.06507   | 1.741  |
| 17  | rs2314810  | 0.05436  | 0.0465   | 0.06236 | 0.005388 | 1.577  | 1.144  | 2.174  | 0.006762 | 1.607  | 0.2317    | 2.499  |
| 17  | rs11080344 | 0.4699   | 0.4601   | 0.4799  | 0.1583   | 1.12   | 0.9567 | 1.312  | 0.2725   | 1.15   | 0.2295    | 1.176  |
| 17  | rs1137933  | 0.2182   | 0.2151   | 0.2214  | 0.8401   | 1.019  | 0.8454 | 1.229  | 0.7467   | 1.038  | 0.8554    | 0.9533 |
| 17  | rs4795067  | 0.3367   | 0.3375   | 0.3359  | 0.6913   | 0.9679 | 0.824  | 1.137  | 0.9226   | 0.9892 | 0.4969    | 0.8889 |
| 17  | rs3729508  | 0.4029   | 0.4022   | 0.4035  | 0.6087   | 0.9602 | 0.8221 | 1.122  | 0.3944   | 0.9064 | 0.8948    | 1.02   |
| 17  | rs3730017  | 0.02309  | 0.02072  | 0.0255  | 0.5392   | 0.8331 | 0.4652 | 1.492  | 0.5392   | 0.8331 | NA        | NA     |
| 17  | rs944725   | 0.4108   | 0.4067   | 0.415   | 0.2601   | 1.094  | 0.9356 | 1.279  | 0.5885   | 1.066  | 0.1615    | 1.225  |
| 17  | rs3794764  | 0.2381   | 0.2372   | 0.2392  | 0.3074   | 1.097  | 0.918  | 1.312  | 0.3554   | 1.11   | 0.4889    | 1.172  |
| 17  | rs8072199  | 0.4293   | 0.4427   | 0.4157  | 0.0471   | 0.8517 | 0.7268 | 0.9979 | 0.03493  | 0.7789 | 0.3033    | 0.8592 |
| 17  | rs3730013  | 0.3437   | 0.3466   | 0.3407  | 0.7679   | 0.9754 | 0.8267 | 1.151  | 0.9987   | 0.9998 | 0.5381    | 0.8956 |
| 17  | rs10459953 | 0.3441   | 0.3579   | 0.33    | 0.2373   | 0.9056 | 0.7683 | 1.067  | 0.2027   |        | 0.613     | 0.9158 |

The cohort for IBD between the ages of 11 and 17 years analysis consisted of 1422 subjects (498 IBD subjects, 351 CD, 147 UC, and 924 healthy controls). p Values are presented as uncorrected. CD, Crohn's disease; MAF, minor allelic frequency; FA, frequency affected; FU, frequency unaffected; IBD, inflammatory bowel disease; L95 and U95, lower and upper 95<sup>th</sup> confidence interval; SNP, single nucleotide polymorphism.; UC, ulcerative colitis.



Supplementary Table 9: Initial cohort association analyses of 17 NOS2 SNPs with CD diagnosed between the ages of 11 and 17 years.

| CHR | SNP        | MAF      | FU       | FA       | Additive |        |        |        | Dominant |        | Recessive |        |
|-----|------------|----------|----------|----------|----------|--------|--------|--------|----------|--------|-----------|--------|
|     |            |          |          |          | P-Value  | OR     | L95    | U95    | P-Value  | OR     | P-Value   | OR     |
| 17  | rs11653716 | 0.03019  | 0.03115  | 0.02805  | 0.6522   | 1.119  | 0.6872 | 1.821  | 0.7859   | 1.072  | 0.9993    | NA     |
| 17  | rs3794756  | 0.007536 | 0.007642 | 0.007299 | 0.346    | 1.525  | 0.634  | 3.668  | 0.346    | 1.525  | NA        | NA     |
| 17  | rs9906835  | 0.4153   | 0.4317   | 0.3787   | 0.7525   | 0.9722 | 0.8161 | 1.158  | 0.6079   | 0.9338 | 0.9633    | 1.007  |
| 17  | rs2314809  | 0.4051   | 0.4032   | 0.4093   | 0.7459   | 0.9714 | 0.815  | 1.158  | 0.9105   | 0.9854 | 0.6421    | 0.924  |
| 17  | rs2297516  | 0.4119   | 0.4246   | 0.3833   | 0.6402   | 1.043  | 0.8749 | 1.243  | 0.7456   | 1.045  | 0.6502    | 1.076  |
| 17  | rs2297518  | 0.1904   | 0.1796   | 0.2145   | 0.8671   | 0.9803 | 0.7764 | 1.238  | 0.7793   | 0.963  | 0.7924    | 1.106  |
| 17  | rs2314810  | 0.05408  | 0.0465   | 0.07108  | 0.005978 | 1.639  | 1.152  | 2.331  | 0.007536 | 1.674  | 0.233     | 2.656  |
| 17  | rs11080344 | 0.4629   | 0.4601   | 0.4693   | 0.4862   | 1.065  | 0.8913 | 1.274  | 0.4718   | 1.108  | 0.6926    | 1.063  |
| 17  | rs1137933  | 0.2206   | 0.2151   | 0.2329   | 0.8852   | 0.9844 | 0.7947 | 1.219  | 0.7651   | 1.039  | 0.2727    | 0.6954 |
| 17  | rs4795067  | 0.342    | 0.3375   | 0.3521   | 0.3618   | 0.9184 | 0.7648 | 1.103  | 0.5944   | 0.9348 | 0.2748    | 0.8019 |
| 17  | rs3729508  | 0.4026   | 0.4022   | 0.4034   | 0.7805   | 0.9754 | 0.819  | 1.162  | 0.4437   | 0.9052 | 0.6472    | 1.079  |
| 17  | rs3730017  | 0.02074  | 0.02072  | 0.02078  | 0.7696   | 0.9085 | 0.4779 | 1.727  | 0.7696   | 0.9085 | NA        | NA     |
| 17  | rs944725   | 0.412    | 0.4067   | 0.424    | 0.3052   | 1.097  | 0.919  | 1.31   | 0.4848   | 1.098  | 0.3099    | 1.181  |
| 17  | rs3794764  | 0.2358   | 0.2372   | 0.2328   | 0.2052   | 1.138  | 0.9317 | 1.39   | 0.2315   | 1.164  | 0.4496    | 1.212  |
| 17  | rs8072199  | 0.44     | 0.4427   | 0.4341   | 0.01683  | 0.8033 | 0.6713 | 0.9613 | 0.008557 | 0.7068 | 0.2577    | 0.8263 |
| 17  | rs3730013  | 0.3455   | 0.3466   | 0.3431   | 0.8829   | 1.014  | 0.8423 | 1.221  | 0.7413   | 1.043  | 0.8392    | 0.9605 |
| 17  | rs10459953 | 0.3506   | 0.3579   | 0.3341   | 0.1007   | 0.8546 | 0.7085 | 1.031  | 0.107    | 0.8145 | 0.3485    | 0.8269 |

The cohort for IBD between the ages of 11 and 17 years analysis consisted of 1422 subjects (498 IBD subjects, 351 CD, 147 UC, and 924 healthy controls). p Values are presented as uncorrected. CD, Crohn's disease; MAF, minor allelic frequency; FA, frequency affected; FU, frequency unaffected; IBD, inflammatory bowel disease; L95 and U95, lower and upper 95<sup>th</sup> confidence interval; SNP, single nucleotide polymorphism.; UC, ulcerative colitis.

Supplementary Table 10: Initial cohort association analyses of 17 NOS2 SNPs with UC diagnosed between the ages of 11 and 17 years.

| CHR | SNP        | MAF      | FU       | FA       | Additive |        |         |       | Dominant |        | Recessive |        |
|-----|------------|----------|----------|----------|----------|--------|---------|-------|----------|--------|-----------|--------|
|     |            |          |          |          | P-Value  | OR     | L95     | U95   | P-Value  | OR     | P-Value   | OR     |
| 17  | rs11653716 | 0.03412  | 0.03115  | 0.03963  | 0.3258   | 0.6498 | 0.2749  | 1.536 | 0.3258   | 0.6498 | NA        | NA     |
| 17  | rs3794756  | 0.007452 | 0.007642 | 0.007099 | 0.4389   | 0.4474 | 0.05839 | 3.428 | 0.4389   | 0.4474 | NA        | NA     |
| 17  | rs9906835  | 0.4313   | 0.4317   | 0.4306   | 0.3161   | 0.8799 | 0.6852  | 1.13  | 0.2792   | 0.818  | 0.6112    | 0.8872 |
| 17  | rs2314809  | 0.3974   | 0.4032   | 0.3867   | 0.3863   | 0.8949 | 0.6962  | 1.15  | 0.6482   | 0.9195 | 0.2971    | 0.7656 |
| 17  | rs2297516  | 0.4249   | 0.4246   | 0.4254   | 0.3722   | 0.8918 | 0.6936  | 1.147 | 0.356    | 0.8426 | 0.6209    | 0.8884 |
| 17  | rs2297518  | 0.1835   | 0.1796   | 0.1908   | 0.07071  | 1.321  | 0.9767  | 1.787 | 0.4415   | 1.154  | 0.0009649 | 3.342  |
| 17  | rs2314810  | 0.0495   | 0.0465   | 0.0551   | 0.1639   | 1.432  | 0.8637  | 2.375 | 0.1807   | 1.449  | 0.5155    | 2.124  |
| 17  | rs11080344 | 0.4701   | 0.4601   | 0.4888   | 0.06856  | 1.266  | 0.9822  | 1.631 | 0.2693   | 1.261  | 0.05852   | 1.474  |
| 17  | rs1137933  | 0.2139   | 0.2151   | 0.2118   | 0.5086   | 1.103  | 0.8249  | 1.475 | 0.8564   | 1.034  | 0.1776    | 1.601  |
| 17  | rs4795067  | 0.3323   | 0.3375   | 0.3224   | 0.4926   | 1.092  | 0.849   | 1.405 | 0.4887   | 1.133  | 0.702     | 1.105  |
| 17  | rs3729508  | 0.4027   | 0.4022   | 0.4037   | 0.5358   | 0.9237 | 0.7184  | 1.188 | 0.6053   | 0.9093 | 0.6183    | 0.8839 |
| 17  | rs3730017  | 0.02376  | 0.02072  | 0.02941  | 0.4297   | 0.6562 | 0.2307  | 1.867 | 0.4297   | 0.6562 | NA        | NA     |
| 17  | rs944725   | 0.407    | 0.4067   | 0.4075   | 0.5026   | 1.089  | 0.8485  | 1.398 | 0.9759   | 0.9944 | 0.1996    | 1.332  |
| 17  | rs3794764  | 0.2397   | 0.2372   | 0.2444   | 0.9772   | 1.004  | 0.752   | 1.341 | 0.9529   | 0.9893 | 0.8434    | 1.076  |
| 17  | rs8072199  | 0.4279   | 0.4427   | 0.4004   | 0.8674   | 0.9786 | 0.7592  | 1.261 | 0.9812   | 0.9954 | 0.7887    | 0.9396 |
| 17  | rs3730013  | 0.3439   | 0.3466   | 0.3387   | 0.3829   | 0.8877 | 0.6794  | 1.16  | 0.5765   | 0.9044 | 0.3389    | 0.7446 |
| 17  | rs10459953 | 0.3469   | 0.3579   | 0.3266   | 0.8008   | 1.034  | 0.7978  | 1.34  | 0.9863   | 1.003  | 0.6261    | 1.136  |
| 17  | rs991804   | 0.03412  | 0.03115  | 0.03963  | 0.5383   | 1.087  | 0.8335  | 1.417 | 0.1594   | 1.288  | 0.2973    | 0.697  |

The cohort for IBD between the ages of 11 and 17 years analysis consisted of 1422 subjects (498 IBD subjects, 351 CD, 147 UC, and 924 healthy controls). p Values are presented as uncorrected. CD, Crohn's disease; MAF, minor allelic frequency; FA, frequency affected; FU, frequency unaffected; IBD, inflammatory bowel disease; L95 and U95, lower and upper 95<sup>th</sup> confidence interval; SNP, single nucleotide polymorphism.; UC, ulcerative colitis.

Supplementary Table 11: Unpublished 2010 Crohn's Disease meta-analysis statistics for the NOS2 Gene (<http://medicine.yale.edu/intmed/ibdgc/index.aspx>).

| SNP        | Chromosome | Position | Allele | P-Value |
|------------|------------|----------|--------|---------|
| rs9901734  | 17         | 23105156 | C      | 0.8     |
| rs8068149  | 17         | 23112982 | G      | 0.33    |
| rs9906835  | 17         | 23113501 | G      | 0.74    |
| rs2297515  | 17         | 23117460 | C      | 0.64    |
| rs2314809  | 17         | 23119505 | T      | 0.21    |
| rs2872753  | 17         | 23119689 | A      | 0.22    |
| rs2297516  | 17         | 23119857 | C      | 0.32    |
| rs2297518  | 17         | 23120724 | G      | 0.74    |
| rs9797244  | 17         | 23121258 | T      | 0.77    |
| rs2274894  | 17         | 23123298 | G      | 0.35    |
| rs4796052  | 17         | 23127161 | C      | 0.88    |
| rs11080344 | 17         | 23128638 | T      | 0.34    |
| rs12944039 | 17         | 23128891 | G      | 0.68    |
| rs4795067  | 17         | 23130802 | G      | 0.38    |
| rs3729508  | 17         | 23133157 | C      | 0.89    |
| rs944724   | 17         | 23133544 | C      | 0.31    |
| rs3794763  | 17         | 23135353 | G      | 0.21    |
| rs3794764  | 17         | 23135555 | G      | 0.2     |
| rs8072199  | 17         | 23140975 | C      | 0.46    |
| rs3794766  | 17         | 23146048 | C      | 0.89    |

Supplementary Table 12: Unpublished 2011 ulcerative colitis meta-analysis statistics for the NOS2 Gene (<http://medicine.yale.edu/intmed/ibdgc/index.aspx>).

| SNP        | Chromosome | Position | Allele | P-Value: OR              |
|------------|------------|----------|--------|--------------------------|
| rs9901734  | 17         | 23105156 | C      | 0.177; 1.04(0.98-1.10)   |
| rs8068149  | 17         | 23112982 | G      | 0.889; 1.02(0.78-1.32)   |
| rs9906835  | 17         | 23113501 | G      | 0.917; 1.01(0.78-1.32)   |
| rs2297515  | 17         | 23117460 | C      | 0.219; 1.32(0.77-2.24)   |
| rs2314809  | 17         | 23119505 | T      | 0.025; 1.05(1.00-1.09)   |
| rs2872753  | 17         | 23119689 | A      | 0.014; 1.05(1.01-1.10)   |
| rs2297516  | 17         | 23119857 | C      | 0.038; 1.05(1.00-1.09)   |
| rs2297518  | 17         | 23120724 | G      | 0.271; 1.03(0.97-1.09)   |
| rs9797244  | 17         | 23121258 | T      | 0.00355; 1.06(1.02-1.11) |
| rs2274894  | 17         | 23123298 | G      | 0.0032; 1.06(1.02-1.11)  |
| rs4796052  | 17         | 23127161 | C      | 0.0183; 1.05(1.01-1.09)  |
| rs11080344 | 17         | 23128638 | T      | 0.305; 1.03(0.98-1.08)   |
| rs12944039 | 17         | 23128891 | G      | 0.526; 1.02(0.97-1.07)   |
| rs4795067  | 17         | 23130802 | G      | 0.00107; 1.07(1.03-1.12) |
| rs3729508  | 17         | 23133157 | C      | 0.923; 1.00(0.95-1.06)   |
| rs944724   | 17         | 23133544 | C      | 0.019; 1.05(1.01-1.09)   |
| rs3794763  | 17         | 23135353 | G      | 0.0126; 1.06(1.01-1.11)  |
| rs3794764  | 17         | 23135555 | G      | 0.559; 1.01(0.97-1.06)   |
| rs8072199  | 17         | 23140975 | C      | 0.257; 1.02(0.98-1.07)   |
| rs3794766  | 17         | 23146048 | C      | 0.573; 1.05(0.91-1.22)   |

| Proxy      | Distance | RSquared | DPrime | Coordinate_HG18 | CD Meta-Analysis P-Value | UC Meta-Analysis P-Value; OR |
|------------|----------|----------|--------|-----------------|--------------------------|------------------------------|
| rs9797244  | 534      | 0.932    | 1.000  | 23121258        | 0.77                     | 0.526; 1.02(0.97-1.07)       |
| rs28944192 | 7187     | 0.932    | 1.000  | 23113537        | N/A                      | N/A                          |
| rs4796052  | 6437     | 0.866    | 0.931  | 23127161        | 0.88                     | 0.923; 1.00(0.95-1.06)       |
| rs4239250  | 6490     | 0.866    | 0.931  | 23127214        | N/A                      | N/A                          |
| rs28944193 | 7283     | 0.866    | 1.000  | 23113441        | N/A                      | N/A                          |
| rs17718148 | 7393     | 0.866    | 0.931  | 23128117        | N/A                      | N/A                          |
| rs28999387 | 7689     | 0.866    | 0.931  | 23128413        | N/A                      | N/A                          |
| rs16966545 | 8025     | 0.866    | 0.931  | 23128749        | N/A                      | N/A                          |
| rs28999385 | 8135     | 0.866    | 0.931  | 23128859        | N/A                      | N/A                          |
| rs28999384 | 8226     | 0.866    | 0.931  | 23128950        | N/A                      | N/A                          |
| rs3729661  | 9152     | 0.866    | 1.000  | 23111572        | N/A                      | N/A                          |
| rs3729727  | 9281     | 0.866    | 1.000  | 23111443        | N/A                      | N/A                          |

Supplementary Table 13: List of “proxy SNPs based on linkage disequilibrium, physical distance and/or membership in selected commercial genotyping arrays. Pair-wise linkage disequilibrium is pre-calculated based on phased genotype data from the [International HapMap Project](#) and the [1000 Genomes Project](#). Information about the genotyping arrays is based on data published by the vendors.” (<http://www.broadinstitute.org/mpg/snap/>). N/A signifies that the variant was not included in the meta-analyses.

Supplementary Table 14: Gene expression from imputation analysis of rs2297518 (from <http://www.sph.umich.edu/csg/liang/imputation/>)

| Gene  | Probe       | effect | SE    | h2   | LOD   | Pvalue  |
|-------|-------------|--------|-------|------|-------|---------|
| ARG2  | 203945_at   | -0.424 | 0.106 | 5.12 | 3.495 | 6.0e-05 |
| BCAS3 | 220488_s_at | -0.363 | 0.106 | 3.76 | 2.559 | 0.00060 |
| EGLN3 | 219232_s_at | -0.359 | 0.106 | 3.69 | 2.514 | 0.00067 |
| GLS2  | 205531_s_at | 0.402  | 0.106 | 4.64 | 3.159 | 1.4e-04 |
| GRK4  | 241989_at   | 0.454  | 0.106 | 5.88 | 4.007 | 1.7e-05 |
| RRAGD | 221524_s_at | 0.360  | 0.105 | 3.73 | 2.536 | 0.00063 |
| RRAGD | 221523_s_at | 0.388  | 0.105 | 4.33 | 2.951 | 0.00023 |
| TPP1  | 200743_s_at | 0.356  | 0.106 | 3.61 | 2.456 | 0.00077 |

“Gene expression in lymphoblastoid cell lines was characterized in a sample of 405 siblings using Affymetrix HG U133 Plus 2.0 chips. Among these individuals, 378 were also genotyped at >300,000 SNPs using the Illumina HumanHap300 arrays, with additional genotypes for SNPs in the Phase II HapMap filled in using imputation. The results summarize the additive association between each SNP and transcripts with estimated heritability > 30% in the sample”
